# Supplementary material for: The therapeutic significance of the novel photodynamic material TPE-IQ-2O in tumors
Source: publisher site journal article supplement (doi:10.18632/aging.202355), 2020-12-19
Supplement: Supplementary file [file aging-v13i1-202355-supplementary-material-SD2.pdf]

## SUPPLEMENTARY TABLES

**Supplementary Table 1. Basic information of cell lines.**

| Cell line | Cell type                               | Species | Tissue    | Culture medium | Source                |
|-----------|-----------------------------------------|---------|-----------|----------------|-----------------------|
| LLC       | lung cancer cell                        | mouse   | lung      | DMEM           | ATCC                  |
| A549      | lung cancer cell                        | human   | lung      | DMEM           | ATCC                  |
| HCC827    | lung cancer cell                        | human   | lung      | DMEM           | ATCC                  |
| NCI-H1299 | lung cancer cell                        | human   | lung      | RPMI-1640      | ATCC                  |
| NCI-H358  | lung cancer cell                        | human   | lung      | RPMI-1640      | ATCC                  |
| NCI-H510  | lung cancer cell                        | human   | lung      | RPMI-1640      | ATCC                  |
| KYSE-180  | esophageal squamous cell carcinoma cell | human   | esophagus | RPMI-1640      | CAS, Shanghai, China  |
| KYSE-30   | esophageal squamous cell carcinoma cell | human   | esophagus | RPMI-1640      | CAS, Shanghai, China  |
| KYSE-450  | esophageal squamous cell carcinoma cell | human   | esophagus | RPMI-1640      | CAS, Shanghai, China  |
| HepG2     | human hepatocarcinoma cell              | human   | liver     | DMEM           | ATCC                  |
| MCF-7     | breast adenocarcinoma cell              | human   | breast    | DMEM           | ATCC                  |
| MC38      | colon carcinoma cell                    | mouse   | colon     | DMEM           | CCTCC, Beijing, China |
| BEAS-2B   | normal bronchial epithelial cell        | human   | lung      | BEGM           | ATCC                  |
| LO-2      | normal liver cell                       | human   | liver     | DMEM/F12       | CAS, Shanghai, China  |
| 3T3       | mouse embryo fibroblast                 | mouse   | embryo    | DMEM           | ATCC                  |
| 293T      | human kidney epithelial cell            | human   | kidney    | DMEM           | ATCC                  |
| HUVEC     | human umbilical vein endothelial cells  | human   | vein      | DMEM           | ATCC                  |

**Supplementary Table 2. Basic information of animal model construction.**

| Animal(Source)                                                    | Model                                   | Implants                        | Main treatment                       |
|-------------------------------------------------------------------|-----------------------------------------|---------------------------------|--------------------------------------|
| AB zebrafish (Model Animal Research Center of Nanjing University) | zebrafish xenograft mode                | mCherry <sup>+</sup> A549 cells | TPE-IQ-2O PDT                        |
| Balb/c nude mice (Beijing Huafukang Biological Co., Ltd)          | Subcutaneous lung xenograft model       | LLC-Luc cells                   | TPE-IQ-2O PDT, Surgery+TPE-IQ-2O PDT |
|                                                                   | Subcutaneous esophageal xenograft model | KYSE-30 cells                   | Surgery+TPE-IQ-2O PDT                |
|                                                                   | orthotopic esophageal cancer model      | KYSE-30 cells                   | Surgery+TPE-IQ-2O PDT                |
| C57BL/6 mice (Beijing Huafukang Biological Co., Ltd)              | LLC tumor-bearing mice                  | LLC cells                       | BMS202+TPE-IQ-2O PDT                 |
|                                                                   | MC38 tumor-bearing mice                 | MC38 cells                      | BMS202+TPE-IQ-2O PDT                 |
